# Supplementary material for: Photochemical synthesis of pyrene perfluoroalkyl derivatives and their embedding in a polymethylmethacrylate matrix: a spectroscopic and structural study
Source: Royal Society of Chemistry journal article supplement (doi:10.1039/c4tc01187b), 2014-01-01
Supplement: c4tc01187b1.pdf [file c4tc01187b1.pdf]

## Supporting Information

# Photochemical synthesis of pyrene perfluoroalkyl derivatives and their embedding in a polymethylmethacrylate matrix. A spectroscopic and structural study.

**Ivana Pibiri,<sup>a,b,\*</sup> Silvestre Buscemi,<sup>a</sup> Antonio Palumbo Piccionello,<sup>a,b</sup> Maria Luisa Saladino,<sup>a,\*</sup>  
Delia Chillura Martino,<sup>a,c</sup> Eugenio Caponetti.<sup>a,d</sup>**

<sup>a</sup> Dipartimento di Scienze e Tecnologie Biologiche, Chimiche e Farmaceutiche, Università degli Studi di Palermo, Viale delle Scienze – Parco d’Orleans II, Ed. 17, I-90128 Palermo, Italy. E-mail: [ivana.pibiri@unipa.it](mailto:ivana.pibiri@unipa.it)

<sup>b</sup> Istituto EuroMediterraneo di Scienza e Tecnologia (IEMEST), Via Emerico Amari 123, 90139, Palermo, Italy.

<sup>c</sup> Consorzio Interuniversitario Nazionale per la Scienza e Tecnologia dei Materiali (INSTM), UdR di Palermo, Viale delle Scienze – Parco d’Orleans II, Ed. 17, I-90128 Palermo, Italy.

<sup>d</sup> Centro Grandi Apparecchiature-UniNetLab, Università di Palermo, Via F. Marini 14, I-90128 Palermo, Italy.

### Contents

|                                           |               |
|-------------------------------------------|---------------|
| <b>UV Experiments.....</b>                | <b>S1</b>     |
| <b>Photoluminescence Experiments.....</b> | <b>S2</b>     |
| <b>Chromaticity coordinates.....</b>      | <b>S3-S6</b>  |
| <b>SAXS Experiments.....</b>              | <b>S7</b>     |
| <b>TEM Experiments.....</b>               | <b>S8-S10</b> |
| <b>TGA Analysis.....</b>                  | <b>S11</b>    |

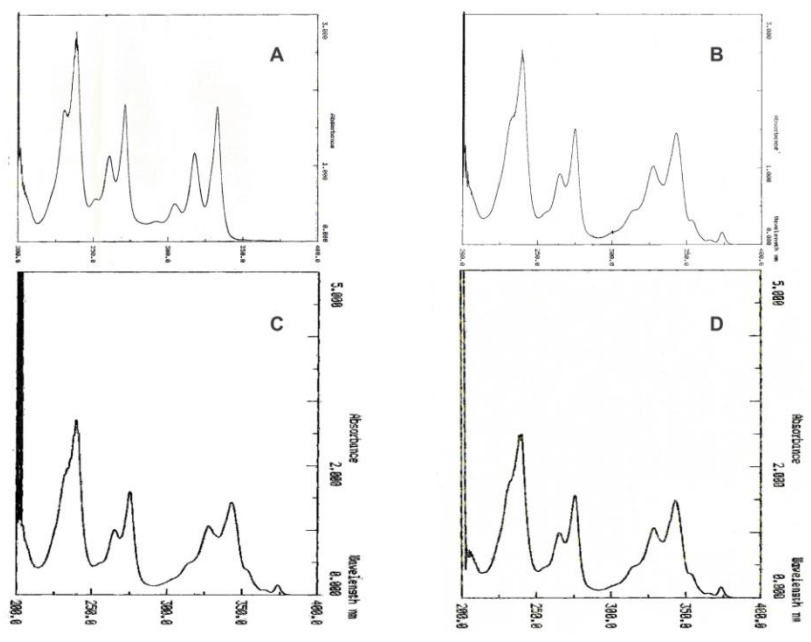

**Figure S1.** UV spectra for pyrene **1** (A) and its derivatives **2a** (B), **2b** (C), **2c** (D) in CH<sub>3</sub>OH solutions.

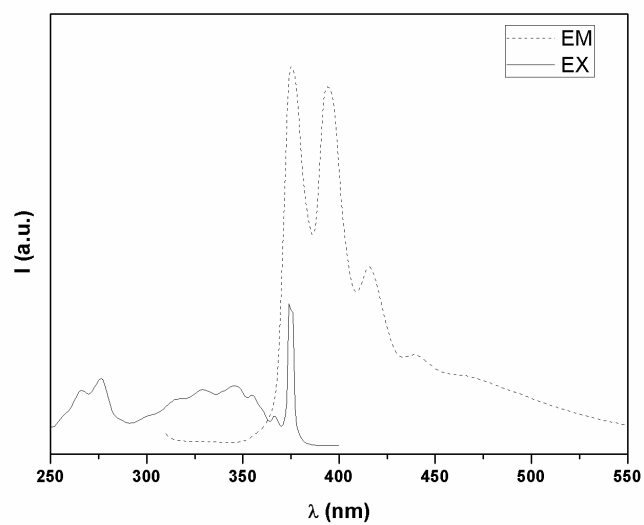

**Figure S2.** Excitation and overlapped Emission spectra for compound **2a** in CH<sub>3</sub>OH solution.

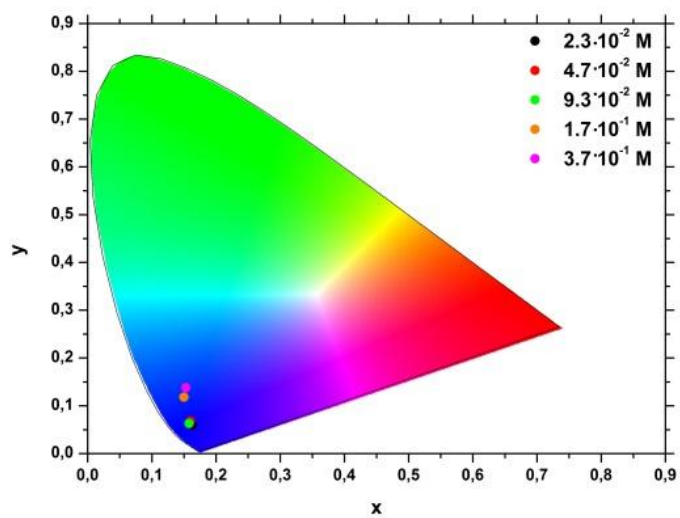

**Figure S3.** Chromaticity coordinates of the **1/PMMA** composites.

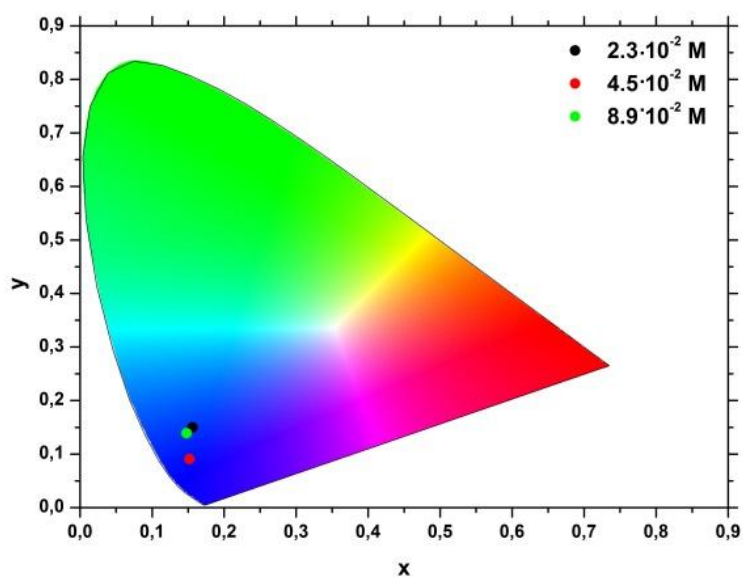

**Figure S4.** Chromaticity coordinates of the **2a/PMMA** composites.

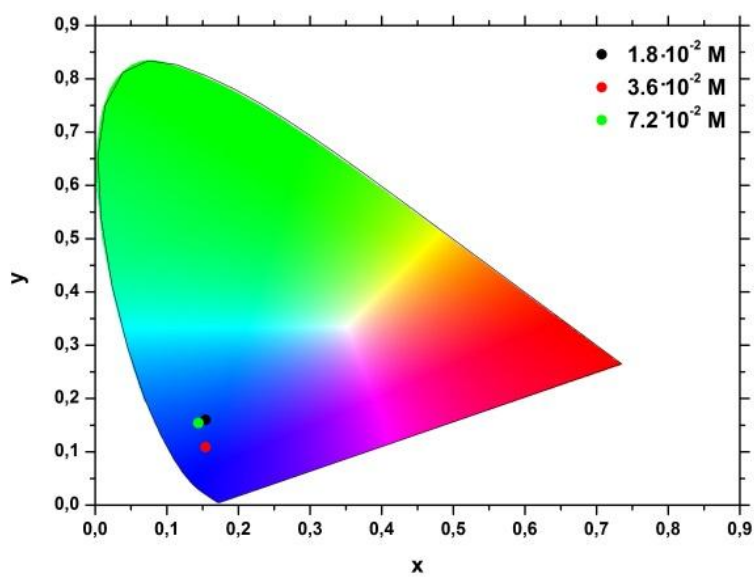

**Figure S5.** Chromaticity coordinates of the **2b/PMMA** composites.

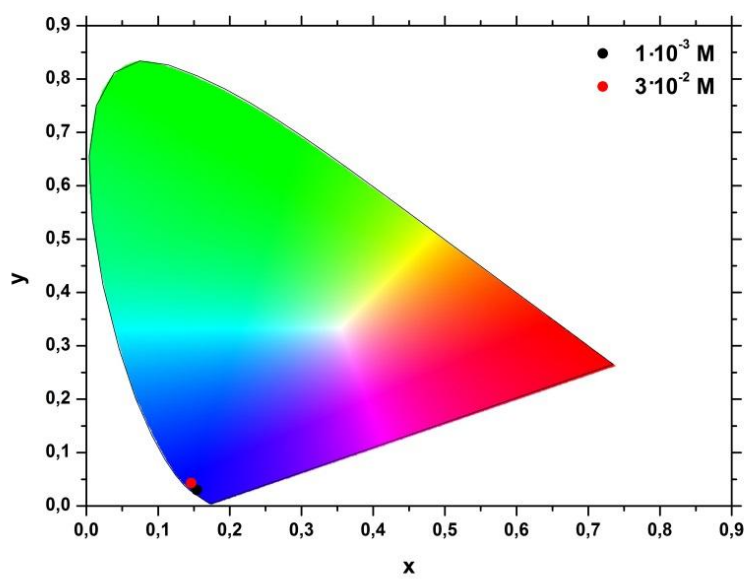

**Figure S6.** Chromaticity coordinates of the **2d/PMMA** composites.

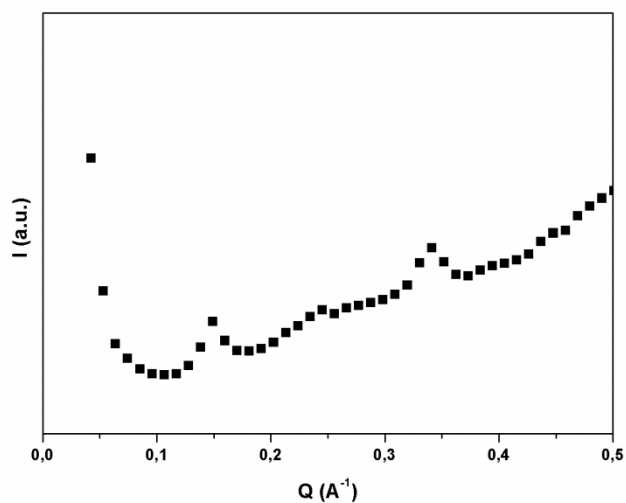

**Figure S7.** SAXS data for sample **2c/PMMA**  $6.4 \cdot 10^{-2}$  M.

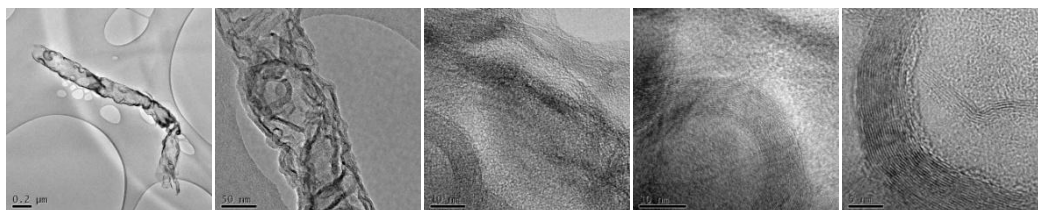

**Figure S8.** TEM micrographs for **1/PMMA** (1%) at (from left to right) 8000X, 60000X, 300000X, 400000X, 600000X respectively.

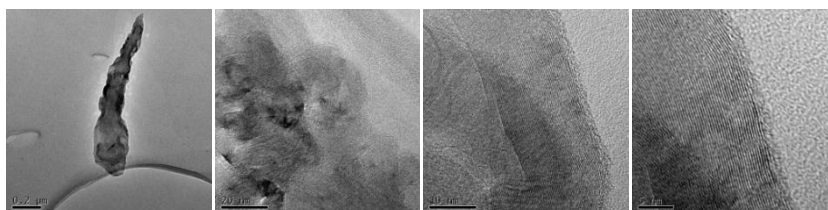

**Figure S9.** TEM micrographs for **2b/PMMA** (2%) at (from left to right) 120000X, 200000X, 400000X, 600000X respectively.

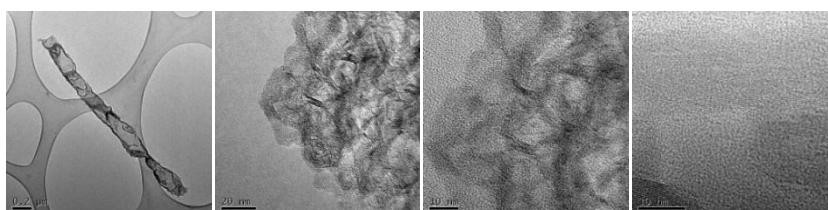

**Figure S10.** TEM micrographs for **2c/PMMA** (4%) at (from left to right) 8000X, 150000X, 250000X, 400000X respectively.

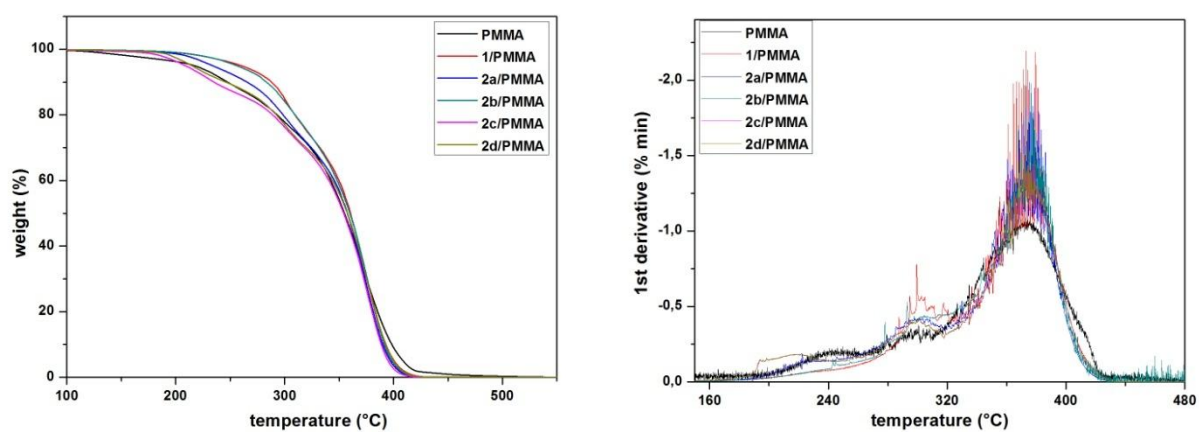

**Figure S11.** TGA and DTG curves of **PMMA**,  $2.33 \cdot 10^{-2} \text{M}$  **1/PMMA**,  $2.3 \cdot 10^{-2} \text{M}$  **2a/PMMA**,  $3.6 \cdot 10^{-2} \text{M}$  **2b/PMMA**,  $3 \cdot 10^{-2} \text{M}$  **2c/PMMA** and  $3 \cdot 10^{-2} \text{M}$  **2d/PMMA**.
